# Supplementary material
Source: PubMed Central journal article supplement (PMC9004354)
Supplement: aem.02552-21-s0001.pdf [file aem.02552-21-s0001.pdf]

## Figure Legends

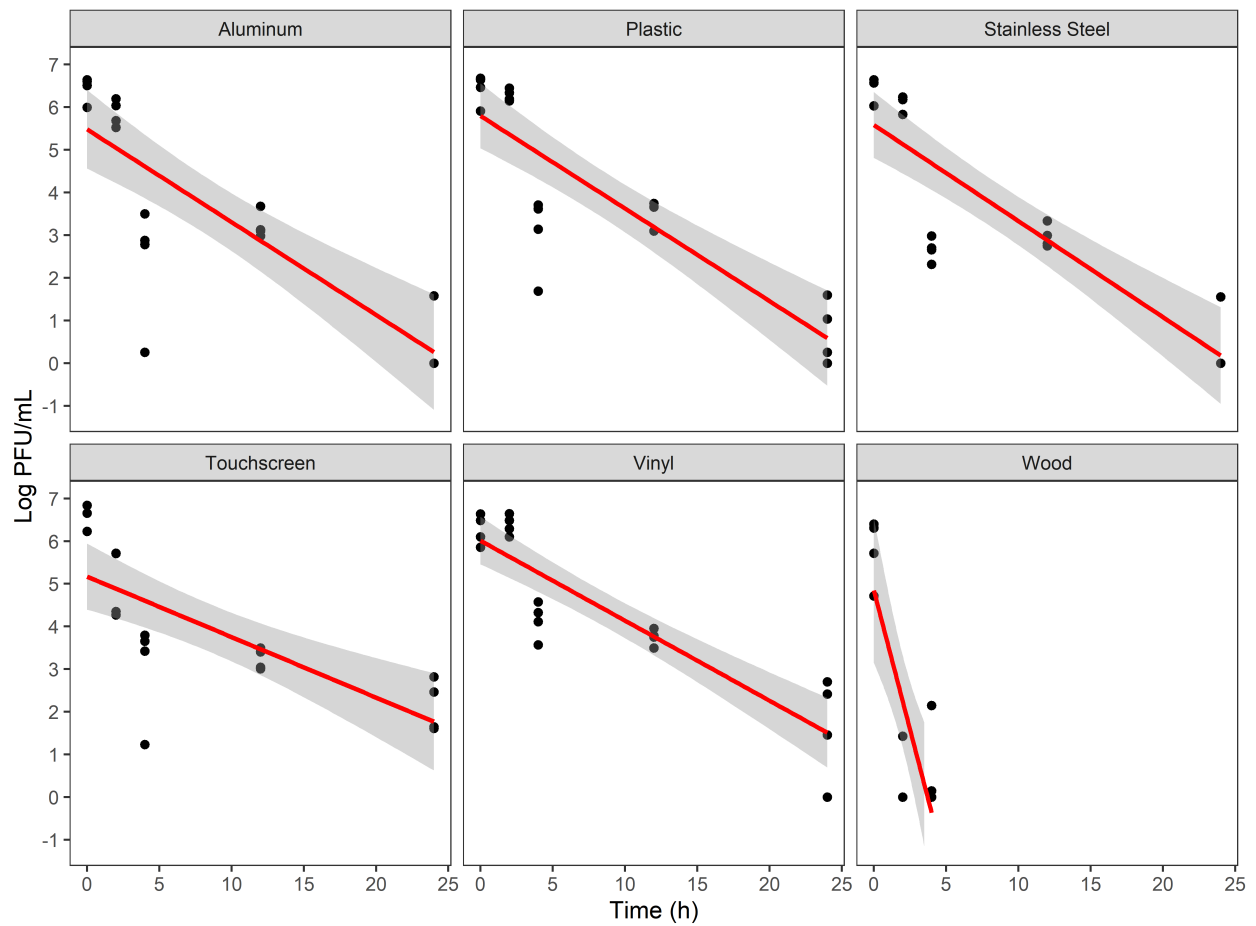

**Fig. S1.** Linear regression models (with 95% CI) of  $\Phi 6$  persistence on various surfaces with a high inoculum level in artificial saliva.

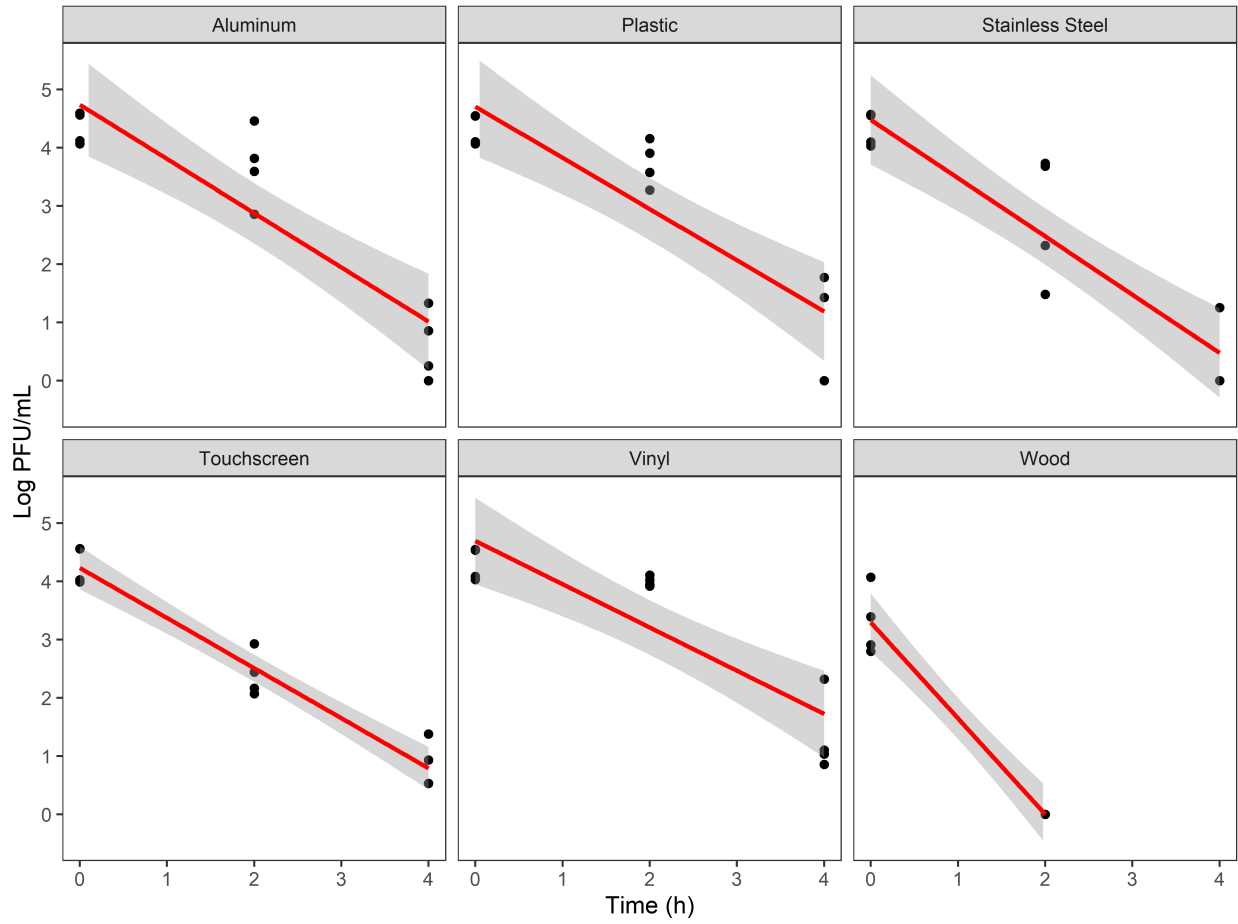

**Fig. S2.** Linear regression models (with 95% CI) of  $\Phi 6$  persistence on various surfaces with a low inoculum level in artificial saliva.

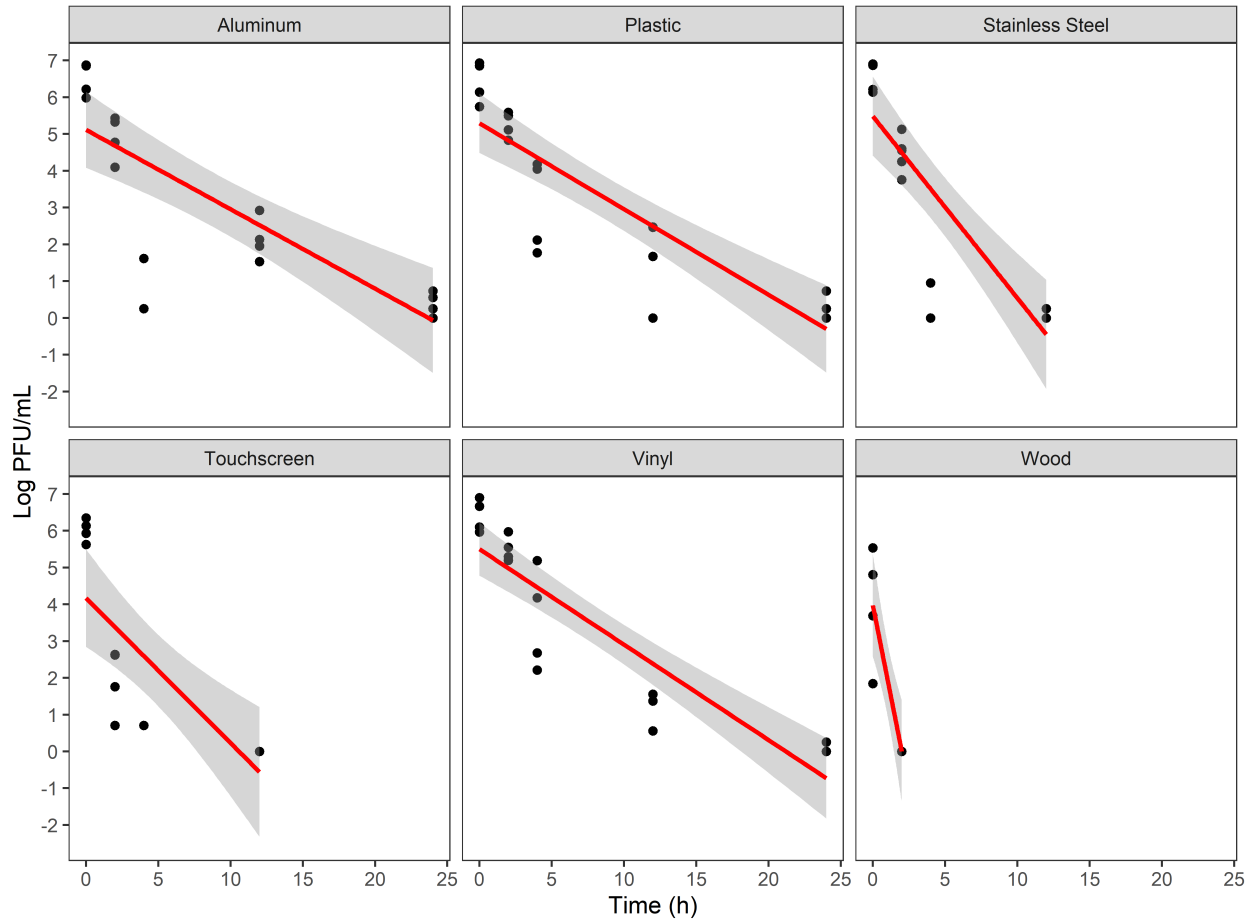

**Fig. S3.** Linear regression models (with 95% CI) of  $\Phi 6$  persistence on various surfaces with a high inoculum level in PBS.

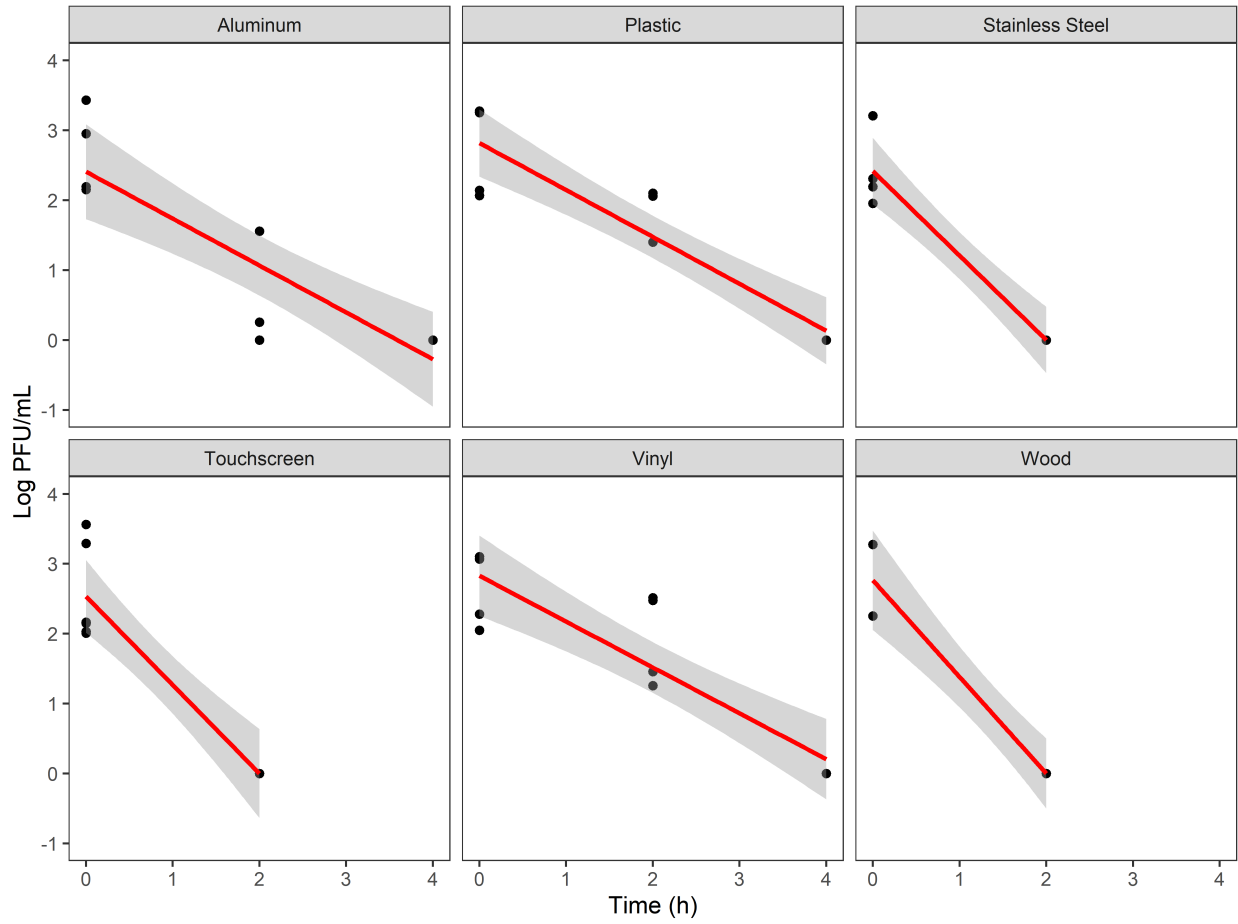

**Fig. S4.** Linear regression models (with 95% CI) of  $\Phi 6$  persistence on various surfaces with a low inoculum level in PBS.

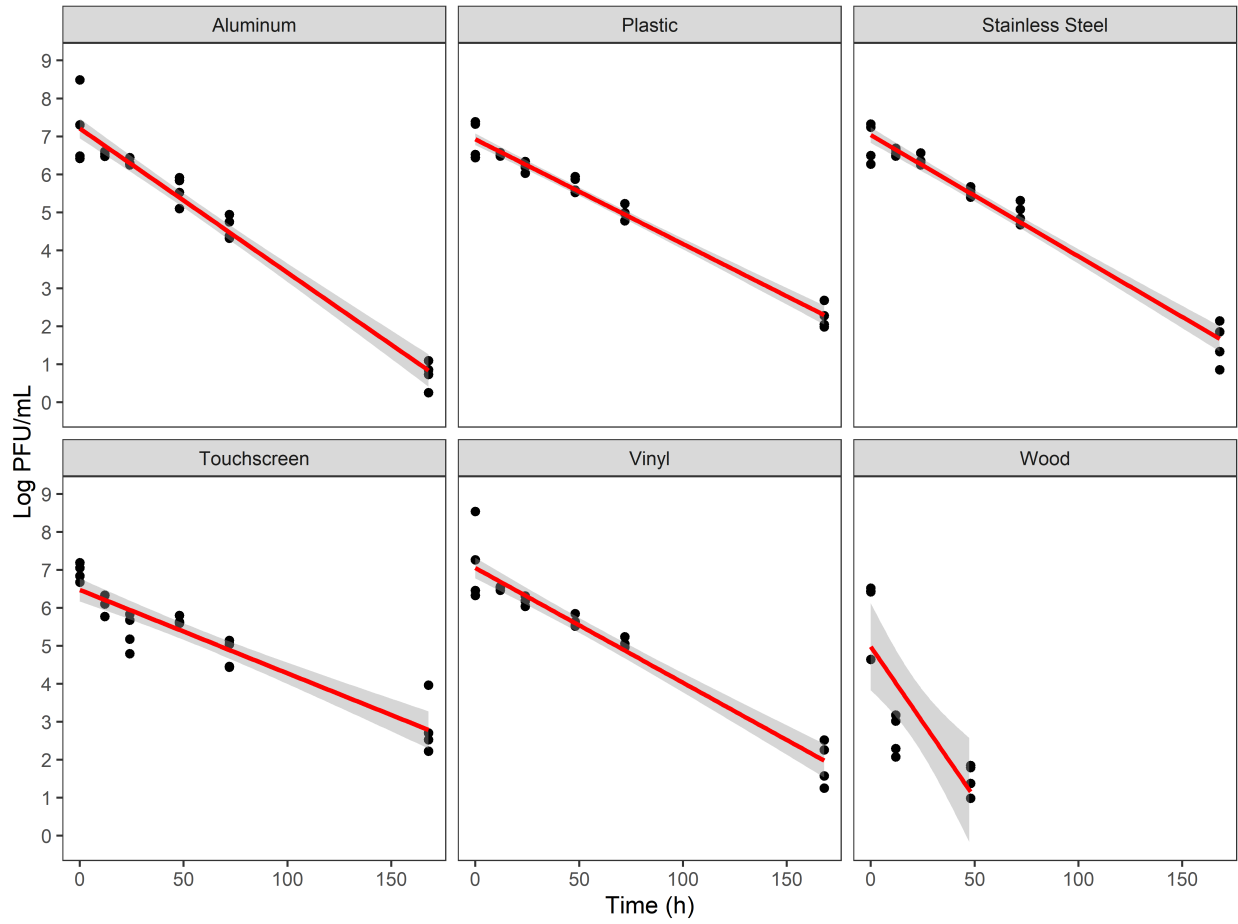

**Fig. S5.** Linear regression models (with 95% CI) of  $\Phi 6$  persistence on various surfaces with a high inoculum level in tripartite.

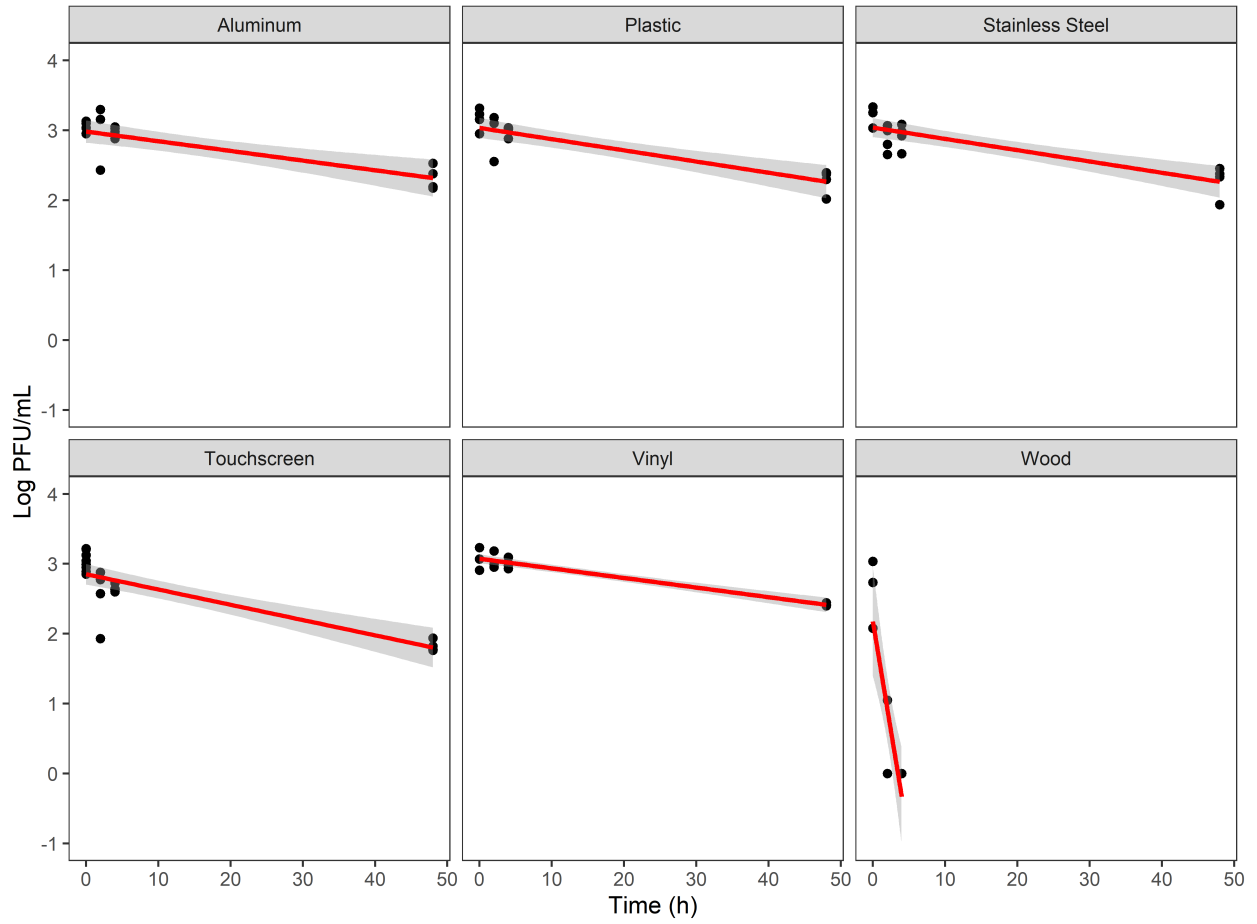

**Fig. S6.** Linear regression models (with 95% CI) of  $\Phi 6$  persistence on various surfaces with a low inoculum level in tripartite.

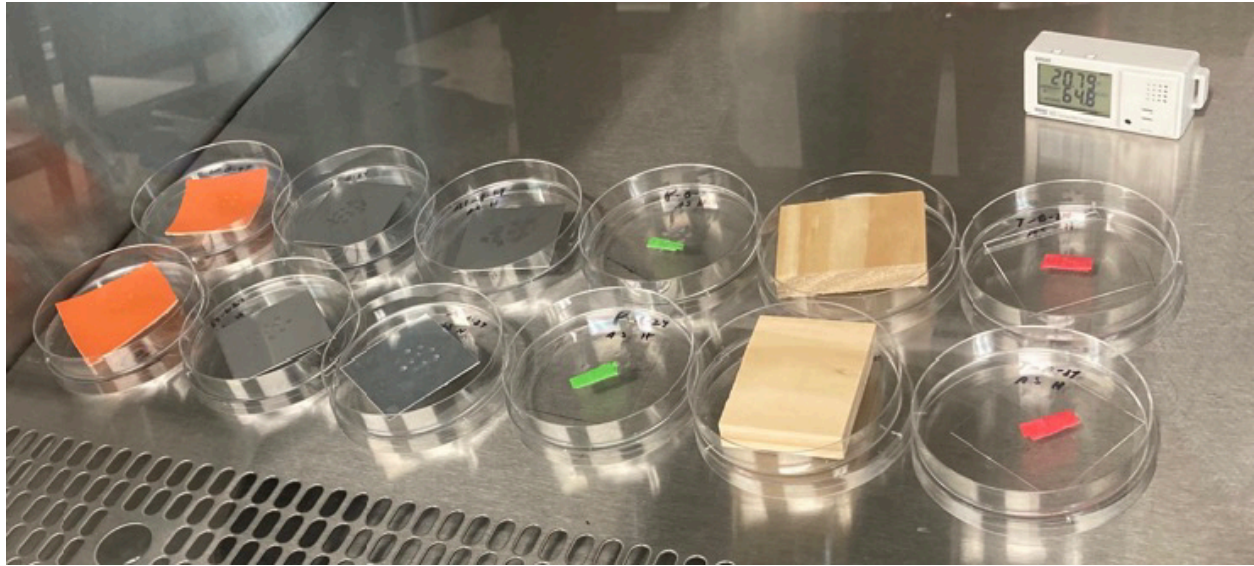

**Fig. S7.** Vinyl, stainless steel, aluminum, plastic, wood, and touchscreen surface coupons in petri dishes (uncovered) incubating in biosafety hood (left to right).
